# Supplementary material for: Retrospective study of gene signatures and prognostic value of m6A regulatory factor in non-small cell lung cancer using TCGA database and the verification of FTO
Source: publisher site journal article supplement (doi:10.18632/aging.103622), 2020-09-09
Supplement: Supplementary file [file aging-v12i17-103622-supplementary-material-SD1.pdf]

## SUPPLEMENTARY TABLES

**Supplementary Table 1. Mutations of m6A regulatory genes in 408 cases.**

| sample          | FTO | ALKBH5 | YTHDF2 | METTL14 | WTAP | YTHDC1 | YTHDC2 | YTHDF1 | METTL3 |
|-----------------|-----|--------|--------|---------|------|--------|--------|--------|--------|
| TCGA-05-4396-01 | 1   | 1      | 1      |         |      |        | 1      | 1      |        |
| TCGA-60-2725-01 |     |        | 1      |         |      |        |        |        |        |
| TCGA-17-Z008-01 |     |        | 1      |         |      |        |        |        |        |
| TCGA-49-4507-01 |     |        | 1      |         |      |        |        |        |        |
| TCGA-49-6742-01 |     |        | 1      |         |      |        |        |        |        |
| TCGA-50-6590-01 |     |        | 1      |         |      |        |        |        |        |
| TCGA-85-6560-01 |     |        |        |         |      |        |        |        | 1      |
| TCGA-05-4417-01 |     |        |        |         |      |        |        |        | 1      |
| TCGA-66-2788-01 |     |        |        |         |      |        |        | 1      |        |
| TCGA-05-4405-01 |     |        |        |         |      |        |        | 1      |        |
| TCGA-64-5775-01 |     |        |        |         |      |        |        | 1      |        |
| TCGA-22-1012-01 |     |        |        |         |      |        |        |        |        |
| TCGA-33-4538-01 |     |        |        |         |      |        |        |        |        |
| TCGA-66-2791-01 |     |        |        |         |      |        |        |        |        |
| TCGA-17-Z003-01 |     |        |        |         |      |        |        |        |        |
| TCGA-50-6594-01 |     |        |        |         |      |        |        |        |        |
| TCGA-73-4670-01 |     |        |        |         |      |        |        |        |        |
| TCGA-91-6836-01 | 1   |        |        |         |      |        | 1      |        |        |
| TCGA-18-3419-01 |     |        |        |         |      |        | 1      |        |        |
| TCGA-56-6545-01 |     |        |        |         |      |        | 1      |        |        |
| TCGA-66-2756-01 |     |        |        |         |      |        | 1      |        |        |
| TCGA-66-2763-01 |     |        |        |         |      |        | 1      |        |        |
| TCGA-17-Z022-01 |     |        |        |         |      |        | 1      |        |        |
| TCGA-35-3621-01 |     |        |        |         |      |        | 1      |        |        |
| TCGA-22-4591-01 |     |        |        |         |      |        |        | 1      |        |
| TCGA-33-6737-01 |     |        |        |         |      |        |        | 1      |        |
| TCGA-17-Z050-01 |     |        |        |         |      |        |        | 1      |        |
| TCGA-44-6775-01 |     |        |        |         |      |        |        | 1      |        |
| TCGA-50-6593-01 |     |        |        |         |      |        |        | 1      |        |
| TCGA-22-4595-01 |     |        |        |         | 1    |        |        |        |        |
| TCGA-66-2744-01 |     |        |        |         | 1    |        |        |        |        |
| TCGA-05-4420-01 |     |        |        |         | 1    |        |        |        |        |
| TCGA-73-4677-01 |     |        |        |         | 1    |        |        |        |        |
| TCGA-75-5125-01 |     |        |        |         | 1    |        |        |        |        |
| TCGA-75-6207-01 |     |        |        |         | 1    |        |        |        |        |
| TCGA-33-4566-01 |     |        |        | 1       |      |        |        |        |        |
| TCGA-05-4433-01 |     |        |        | 1       |      |        |        |        |        |
| TCGA-17-Z011-01 |     |        |        | 1       |      |        |        |        |        |
| TCGA-44-6777-01 |     |        |        | 1       |      |        |        |        |        |
| TCGA-50-5044-01 |     |        |        | 1       |      |        |        |        |        |
| TCGA-17-Z028-01 |     | 1      |        |         |      |        |        |        |        |
| TCGA-18-3407-01 | 1   |        |        |         |      |        |        |        |        |
| TCGA-22-5485-01 | 1   |        |        |         |      |        |        |        |        |
| TCGA-66-2766-01 | 1   |        |        |         |      |        |        |        |        |
| TCGA-05-4390-01 | 1   |        |        |         |      |        |        |        |        |

The number 1 means there is a mutation of m6A regulatory genes in the sample.

**Supplementary Table 2. Gene enrichment results of high expression of FTO in patients with NSCLC.**

| <b>GS DETAILS</b>                | <b>Size</b> | <b>ES</b>  | <b>NES</b> | <b>Nom p-val</b> | <b>FDR q-val</b> |
|----------------------------------|-------------|------------|------------|------------------|------------------|
| HALLMARK_UV_RESPONSE_DN          | 136         | -0.57      | -1.96      | 0                | 0.069            |
| HALLMARK_ANDROGEN_RESPONSE       | 96          | -0.43      | -1.81      | 0.018            | 0.12             |
| HALLMARK_TGF_BETA_SIGNALING      | 54          | -0.51      | -1.76      | 0.025            | 0.12             |
| HALLMARK_MYOGENESIS              | 199         | -0.51      | -1.57      | 0.011            | 0.22             |
| HALLMARK_HEDGEHOG_SIGNALING      | 35          | -0.58      | -1.56      | 0.01996          | 0.21             |
| HALLMARK_ANGIOGENESIS            | 36          | -0.58      | -1.55      | 0.034            | 0.19             |
| HALLMARK_KRAS_SIGNALING_UP       | 194         | -0.5222249 | -1.5274777 | 0.02868852       | 0.2020273        |
| HALLMARK_HEME_METABOLISM         | 191         | -0.3403853 | -1.5154847 | 0.01992032       | 0.1987541        |
| HALLMARK_ESTROGEN_RESPONSE_EARLY | 192         | -0.3725932 | -1.402012  | 0.04364326       | 0.23626567       |
